# Supplementary material
Source: HighWire-hosted journal article supplement (https://jitc.bmj.com/content/10/7/e004935)
Supplement: inline-supplementary-material-4 [file inline-supplementary-material-4.xlsx]

## Sheet: MDSC
ENSEMBL
ENSMUSG00000054676
ENSMUSG00000057191
ENSMUSG00000026457
ENSMUSG00000060063
ENSMUSG00000021125
ENSMUSG00000033508
ENSMUSG00000022663
ENSMUSG00000037400
ENSMUSG00000039105
ENSMUSG00000036478
ENSMUSG00000049130
ENSMUSG00000025804
ENSMUSG00000051439
ENSMUSG00000004609
ENSMUSG00000038147
ENSMUSG00000096472
ENSMUSG00000030144
ENSMUSG00000030142
ENSMUSG00000028859
ENSMUSG00000007891
ENSMUSG00000058427
ENSMUSG00000026180
ENSMUSG00000003484
ENSMUSG00000024190
ENSMUSG00000031490
ENSMUSG00000027533
ENSMUSG00000039753
ENSMUSG00000059498
ENSMUSG00000039899
ENSMUSG00000021360
ENSMUSG00000058624
ENSMUSG00000028480
ENSMUSG00000078780
ENSMUSG00000027346
ENSMUSG00000022564
ENSMUSG00000031584
ENSMUSG00000069919
ENSMUSG00000027360
ENSMUSG00000031722
ENSMUSG00000053560
ENSMUSG00000003541
ENSMUSG00000025491
ENSMUSG00000060591
ENSMUSG00000023046
ENSMUSG00000027398
ENSMUSG00000044103
ENSMUSG00000030748
ENSMUSG00000052837
ENSMUSG00000022500
ENSMUSG00000024590
ENSMUSG00000037095
ENSMUSG00000031812
ENSMUSG00000075705
ENSMUSG00000045636
ENSMUSG00000001156
ENSMUSG00000032508
ENSMUSG00000042684
ENSMUSG00000058755
ENSMUSG00000039361
ENSMUSG00000023913
ENSMUSG00000028657
ENSMUSG00000030069
ENSMUSG00000022651
ENSMUSG00000059810
ENSMUSG00000054855
ENSMUSG00000048234
ENSMUSG00000027907
ENSMUSG00000001025
ENSMUSG00000026581
ENSMUSG00000048163
ENSMUSG00000049091
ENSMUSG00000033720
ENSMUSG00000030474
ENSMUSG00000059182
ENSMUSG00000025993
ENSMUSG00000078763
ENSMUSG00000027287
ENSMUSG00000053113
ENSMUSG00000020077
ENSMUSG00000012428
ENSMUSG00000022902
ENSMUSG00000059657
ENSMUSG00000054905
ENSMUSG00000026094
ENSMUSG00000051397
ENSMUSG00000025503
ENSMUSG00000053338
ENSMUSG00000027506
ENSMUSG00000041736
ENSMUSG00000028367
ENSMUSG00000019505
ENSMUSG00000020407
ENSMUSG00000069792
ENSMUSG00000042675
ENSMUSG00000029860
